# Supplementary material for: High-Resolution, Transparent, and Flexible Printing of Polydimethylsiloxane via Electrohydrodynamic Jet Printing for Conductive Electronic Device Applications
Source: MDPI journal article supplement (doi:10.3390/polym14204373), 2022-10-17
Supplement: s1 [file s1]

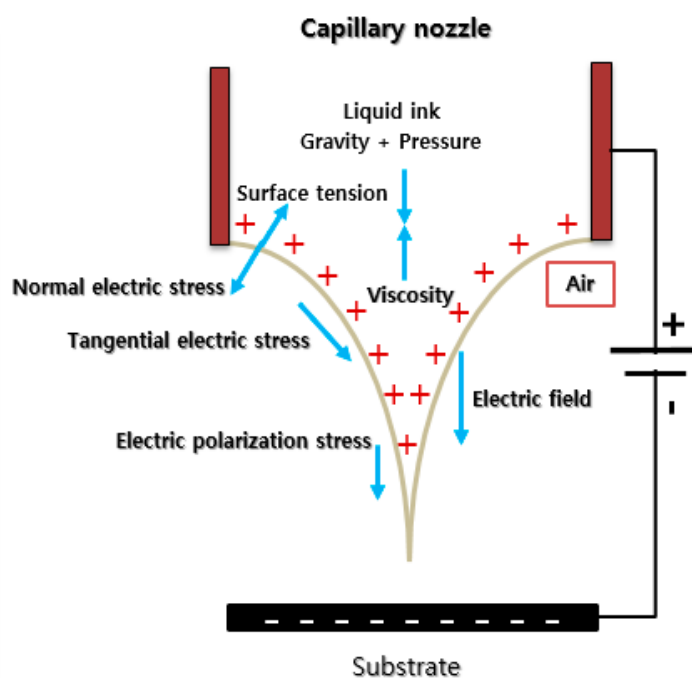

**Figure S1.** Physics of EHD jet printing where forces acting on a capillary tip during EHD printing by cone jet mode

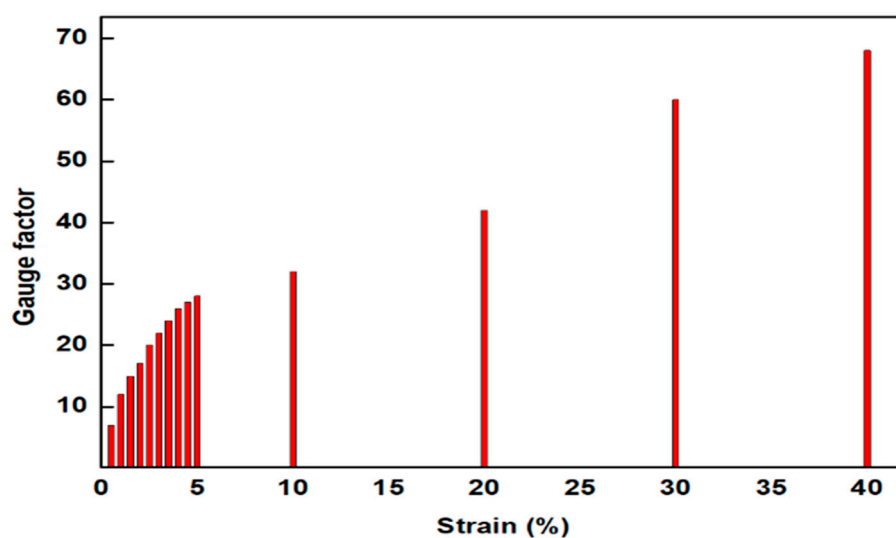

**Figure S2.** Various gauge factor values according to the strain

**Table S1.** Comparison of printing techniques and resolutions.

| No. | Printing Technique | Width (μm) | Applications           | Ref. |
|-----|--------------------|------------|------------------------|------|
| 1   | Direct Writing     | 50         | Strain sensor          | 36   |
| 2   | UV laser writing   | 30         | Additive manufacturing | 43   |
| 3   | Razor writing      | 500        | Microchannels          | 44   |
| 4   | 3D printing        | 150        | Terahertz              | 45   |
| 5   | 3D printing        | 8000       | Strain sensor          | 46   |
| 6   | Mold Technique     | 18000      | Flow sensor            | 47   |
| 7   | This Work          | 5-10       | Strain sensor          | 2022 |
